# Supplementary material for: Computational study of structural properties of lithium cation complexes with carbamate-modified disiloxanes
Source: Royal Society of Chemistry journal article supplement (doi:10.1039/c4cp01837k), 2014-01-01
Supplement: c4cp01837k1.pdf [file c4cp01837k1.pdf]

Electronic Supplementary Information

# Computational study of structural properties of lithium cation complexes with carbamate-modified disiloxanes

Steffen Jeschke,\* Hans-Dieter Wiemhöfer and Christian Mück-Lichtenfeld

Institute of Inorganic and Analytical Chemistry, University Münster, Corrensstr. 28/30, 48149 Münster, Germany

\*e-mail: s.jeschke@wwu.de

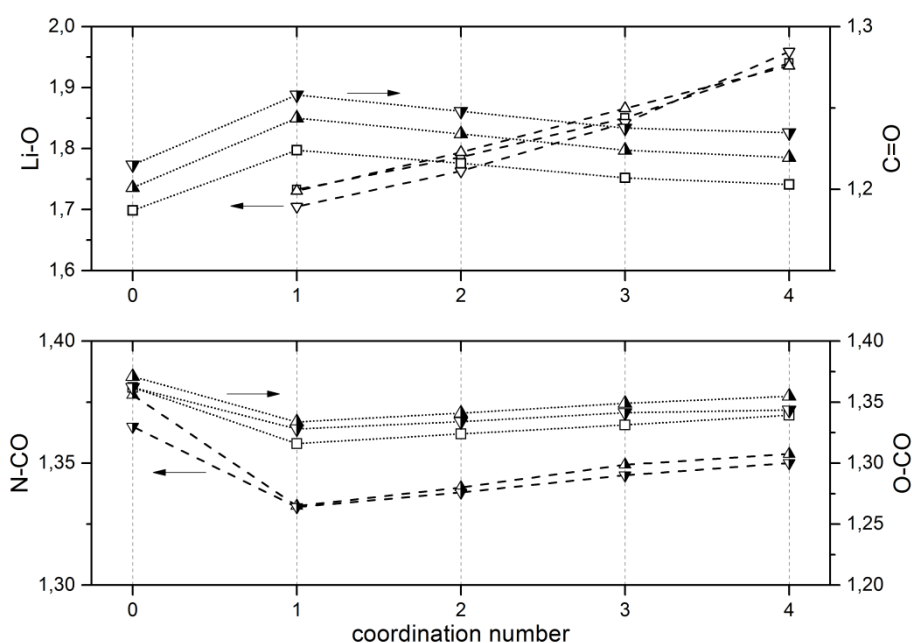

**Figure S1** Examples of various bond length for solvents **1** (□), **3** (△) and **4** (▽); identical values for carbamate-modified disiloxanes and simplified carbamates are denoted as ▲ for **3/5** and ▼ for **4/6** [in Å].

**Table T1** Atomic NBO charges of carbonyl functionalities in isolated solvents **1** - **6**.

|             | <b>1</b> | <b>2</b> | <b>3</b> | <b>4</b> | <b>5</b> | <b>6</b> |
|-------------|----------|----------|----------|----------|----------|----------|
| <b>C=O</b>  | -0.56    | -0.64    | -0.61    | -0.67    | -0.63    | -0.68    |
| <b>C=O</b>  | 1.02     | 1.04     | 0.93     | 0.94     | 0.94     | 0.94     |
| <b>O-CO</b> | -0.55    | -0.54    | -0.55    | -0.58    | -0.55    | -0.57    |
| <b>N-CO</b> | –        | –        | -0.51    | -0.48    | -0.52    | -0.49    |

**Table T2** Radius *r* and volume *V* of spherical cavities for solvation structure [Li(S)<sub>4</sub>]<sup>+</sup> of solvents **1** - **6**.

|                                                             | <b>1</b> | <b>2</b> | <b>3</b> | <b>4</b> | <b>5</b> | <b>6</b> |
|-------------------------------------------------------------|----------|----------|----------|----------|----------|----------|
| <i>r</i> [Li(S) <sub>4</sub> ] <sup>+</sup> /Å              | 5.52     | 5.79     | 5.63     | 6.35     | 8.14     | 8.76     |
| <i>V</i> [Li(S) <sub>4</sub> ] <sup>+</sup> /Å <sup>3</sup> | 705      | 813      | 748      | 1074     | 2259     | 2816     |

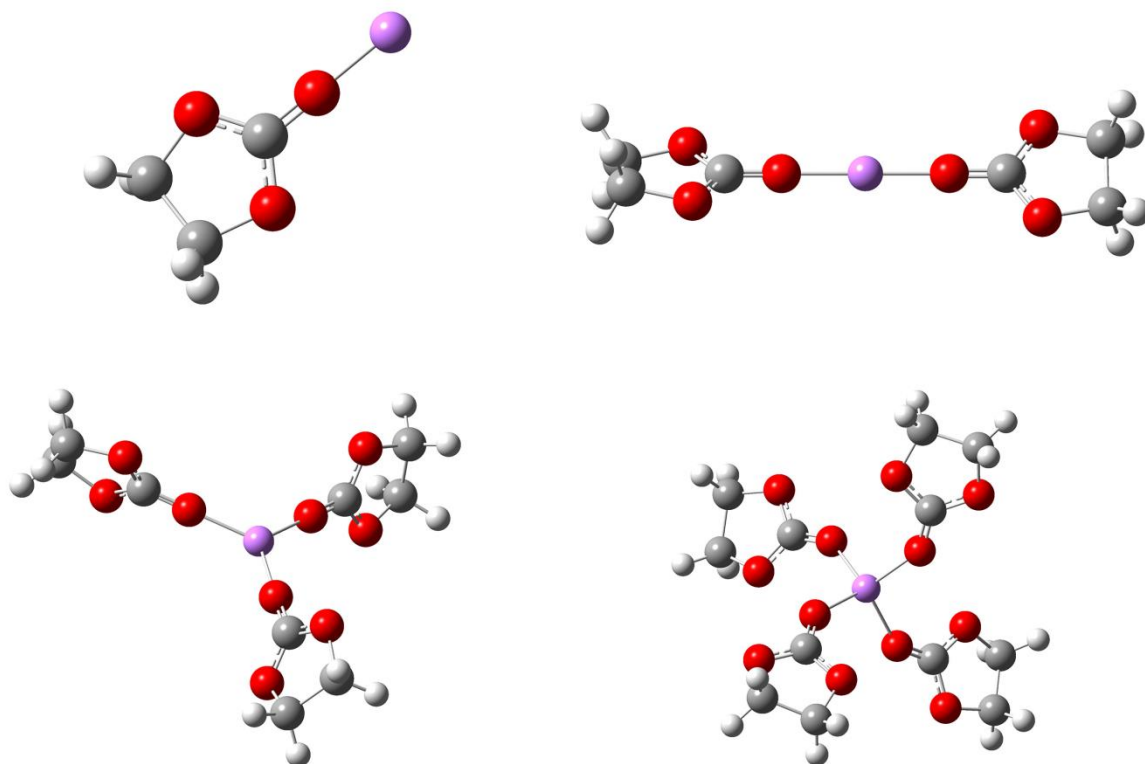

**Figure S2** Geometries of solvation structures  $[\text{Li}(\mathbf{1})_{n=1-4}]^+$  optimized at B3LYP/6-311G(d,p) level of theory.

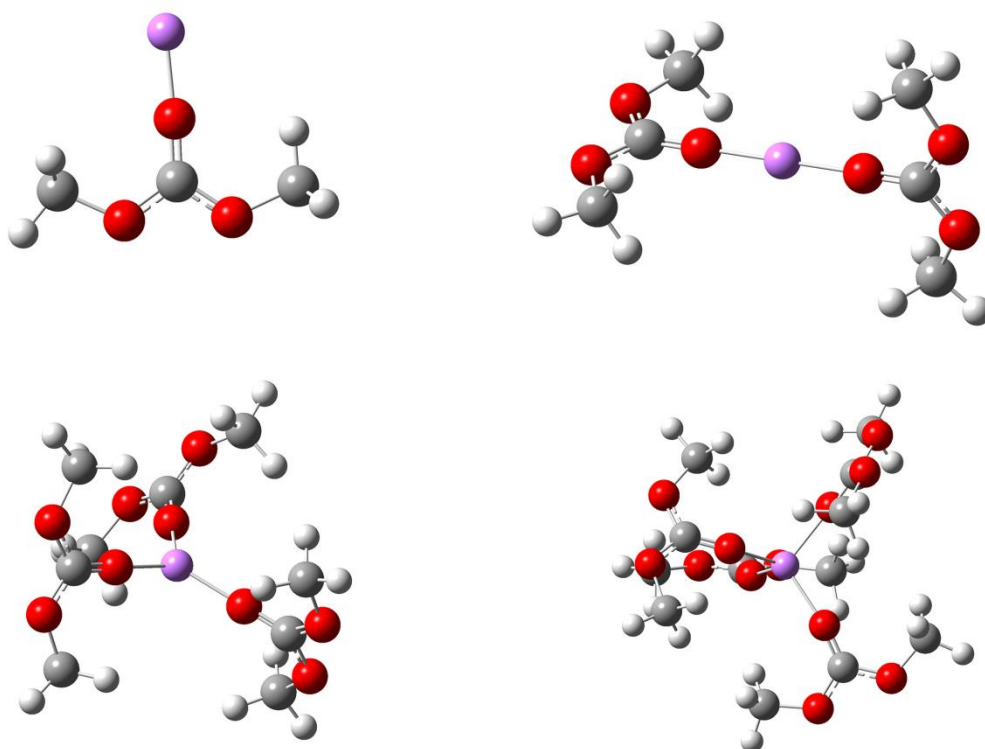

**Figure S3** Geometries of solvation structures  $[\text{Li}(\mathbf{2})_{n=1-4}]^+$  optimized at B3LYP/6-311G(d,p) level of theory.

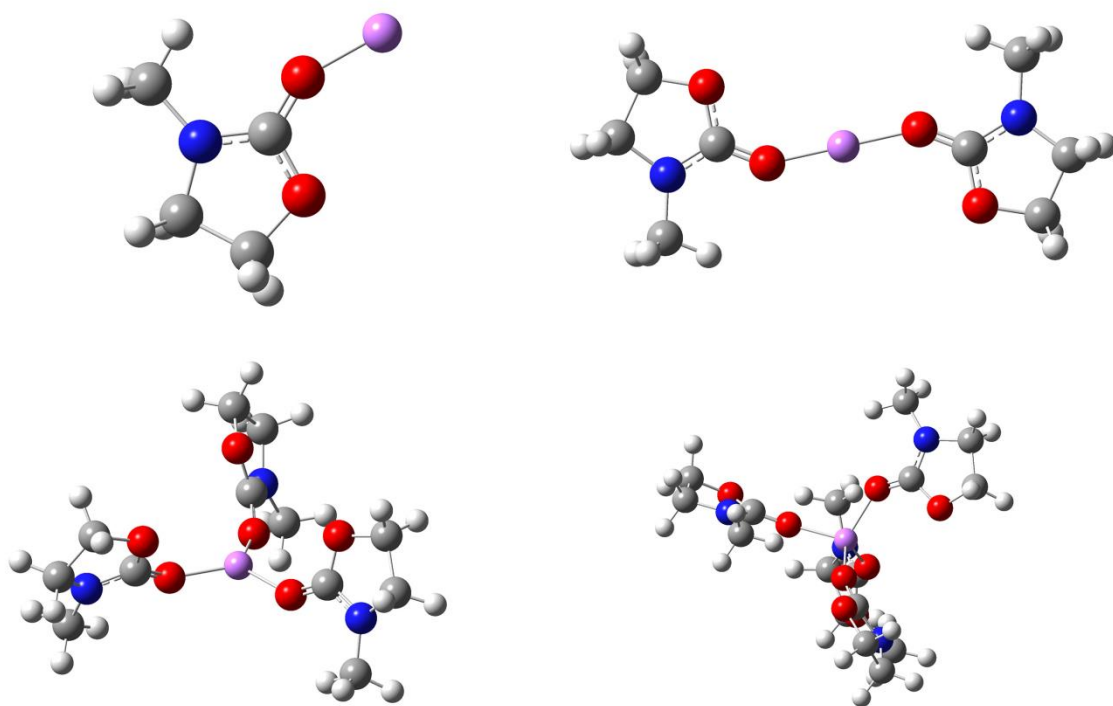

**Figure S4** Geometries of solvation structures  $[\text{Li}(\mathbf{3})_{n=1-4}]^+$  optimized at B3LYP/6-311G(d,p) level of theory.

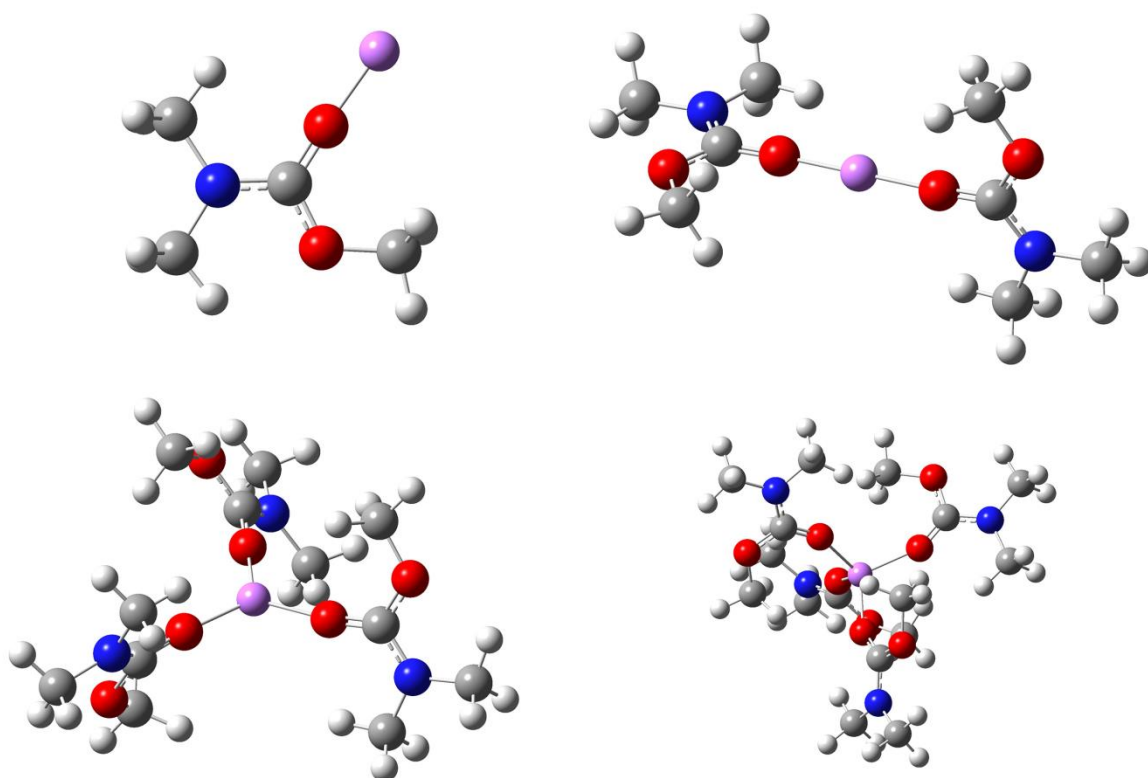

**Figure S5** Geometries of solvation structures  $[\text{Li}(\mathbf{4})_{n=1-4}]^+$  optimized at B3LYP/6-311G(d,p) level of theory.

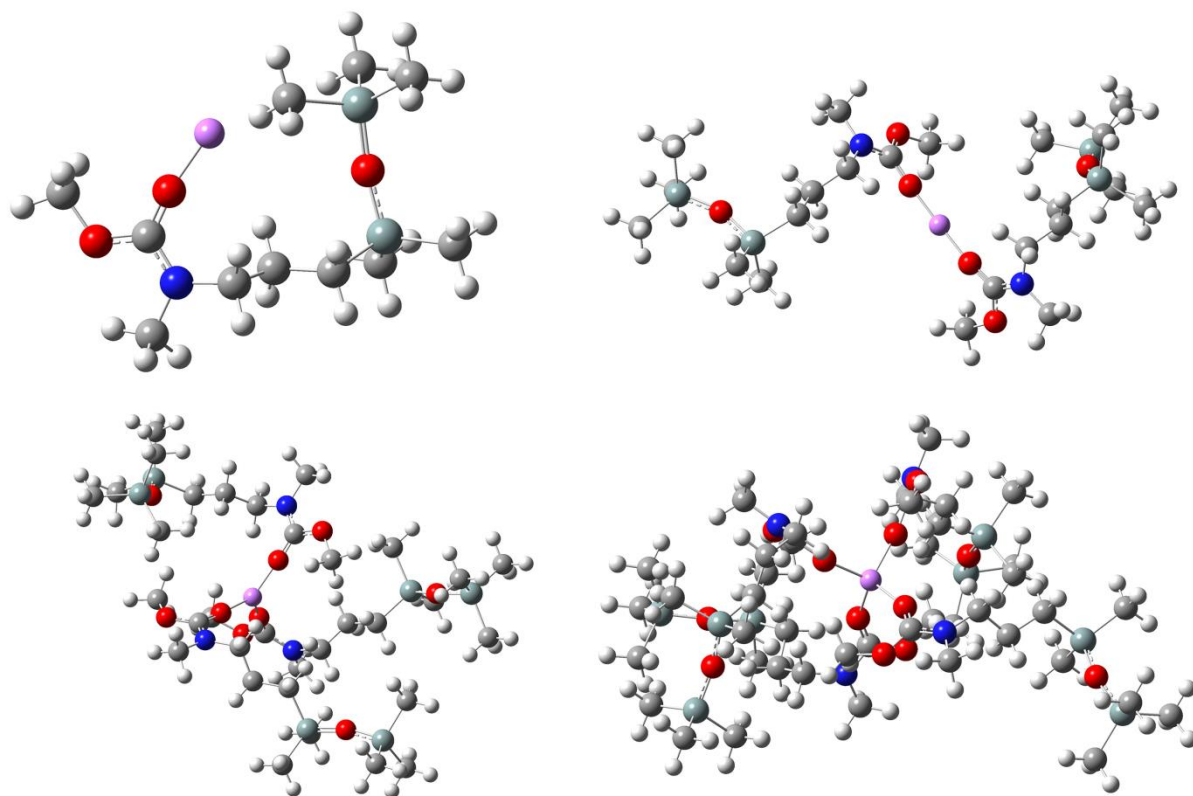

**Figure S6** Geometries of solvation structures  $[\text{Li}(\mathbf{6})_{n=1-4}]^+$  optimized at B3LYP/6-311G(d,p) level of theory.
